# Supplementary material for: Ag3O4grafted NiO nanosheets for high performance supercapacitors
Source: Royal Society of Chemistry journal article supplement (doi:10.1039/c4ta04586f), 2014-10-31
Supplement: c4ta04586f1.pdf [file c4ta04586f1.pdf]

## Ag<sub>3</sub>O<sub>4</sub> Grafted NiO Nanosheets for High Performance Supercapacitors

*Inbamani Manohara Babu<sup>1</sup>, Kamatchi Kamaraj Purushothaman<sup>\*2</sup>, Gopalan Muralidharan<sup>1</sup>*

<sup>1</sup>Department of Physics, Gandhigram Rural University, Gandhigram-624302, Tamilnadu, India

<sup>\*2</sup>Department of Physics, TRP Engineering College (SRM group), Irungalur, Tamilnadu.

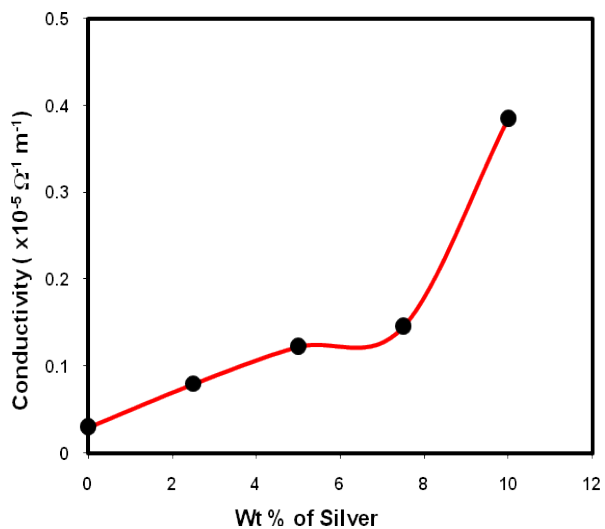

Fig. S1 Variation of conductivity with silver level in NiO

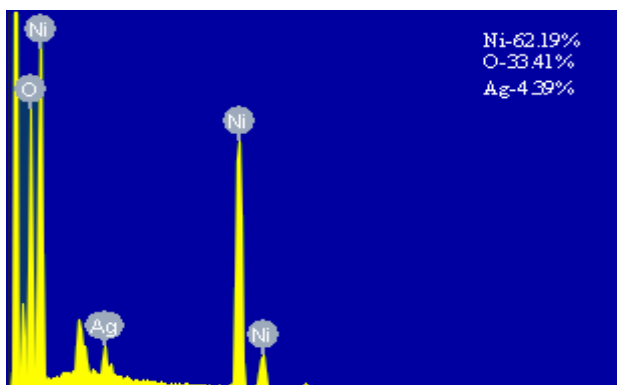

Fig S2. EDS pattern of AGN2

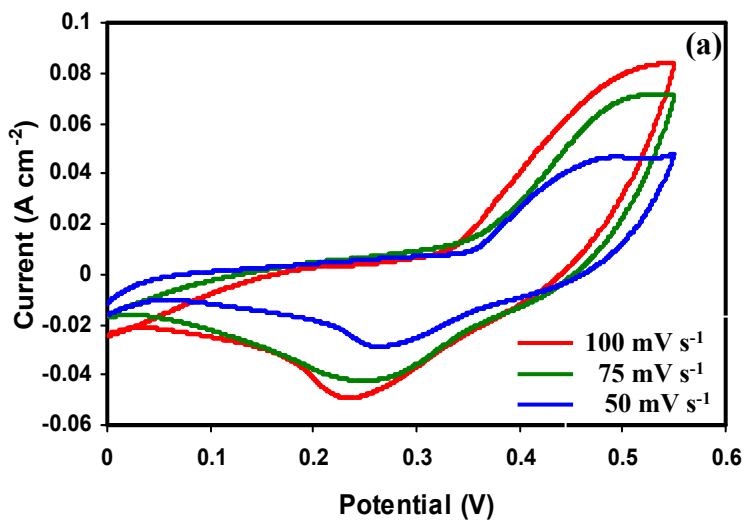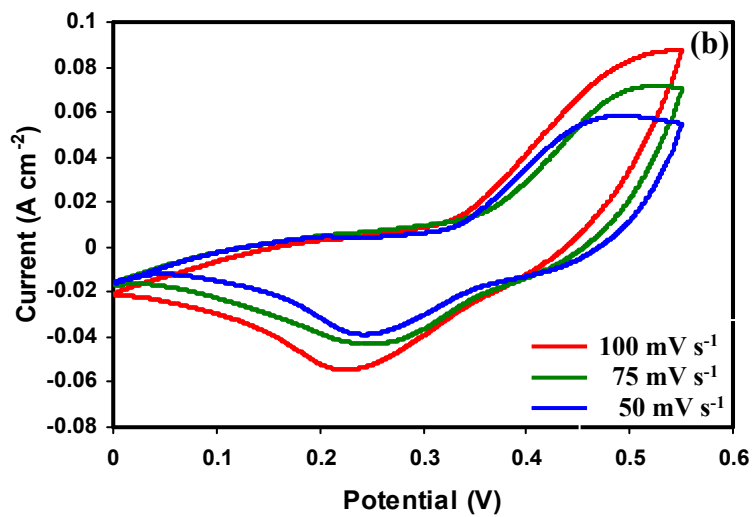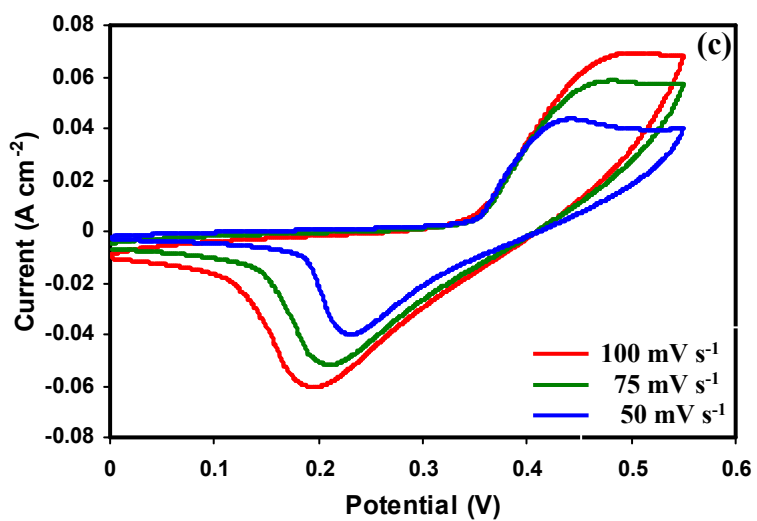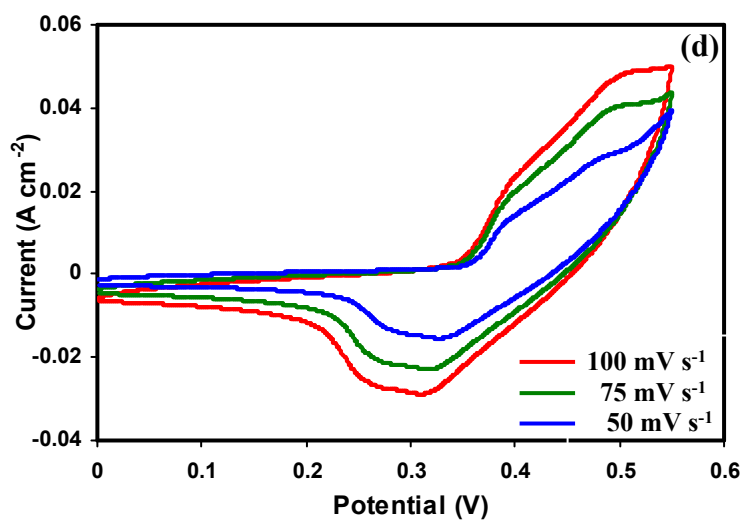

Fig. S3 Cyclic Voltammograms of (a) AGN1, (b) AGN2, (c) AGN3 and (d) AGN4 at higher scan rates.

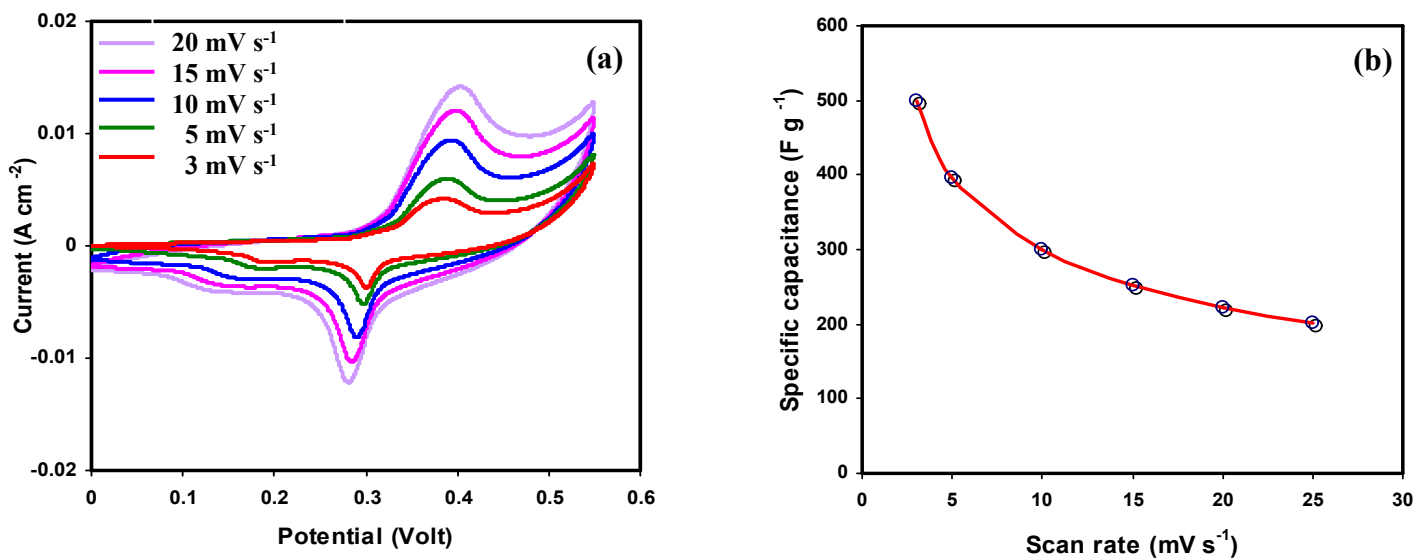

Fig. S4 (a) Cyclic voltammograms of pure NiO at different scan rates. (b) Specific capacitance as a function of scan rate.

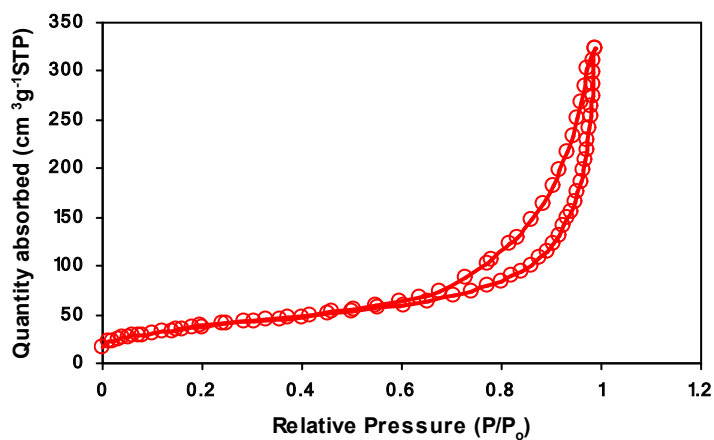

Fig. S5 Nitrogen adsorption-desorption isotherms & pore size distribution (inset) of AGN2

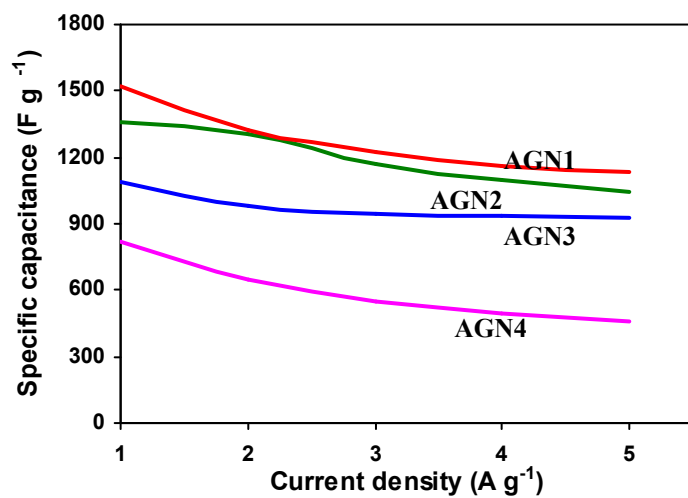

Fig. S6 Specific capacitance as a function of Current density

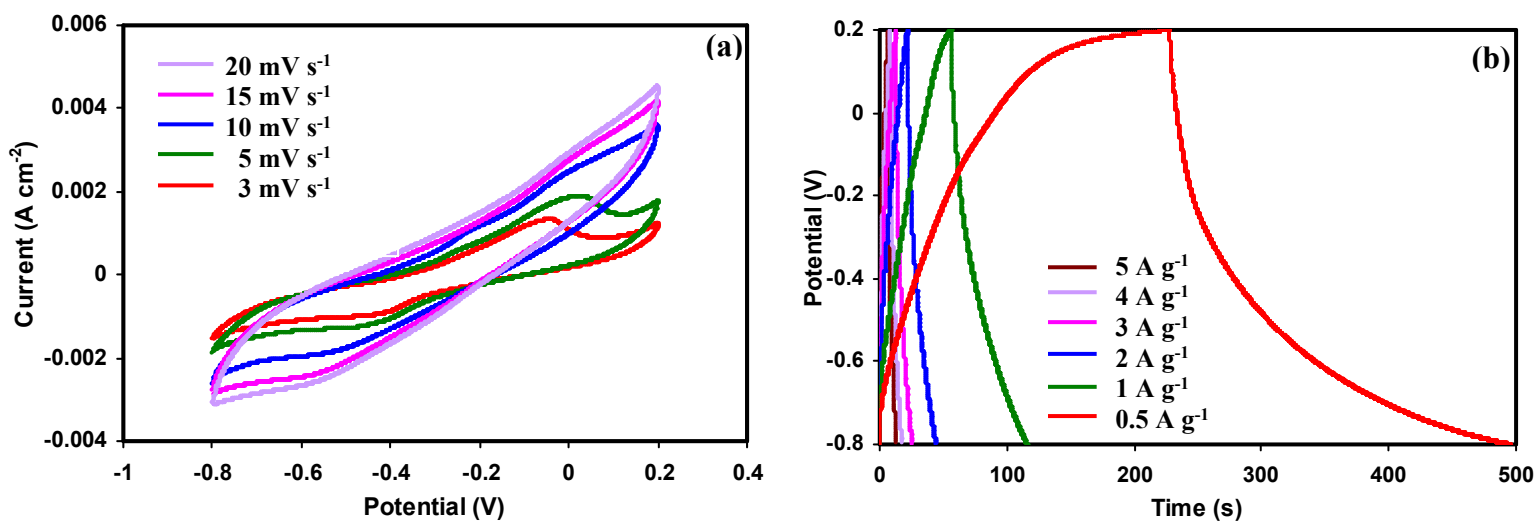

Fig. S7 (a) CV profile of RGO at different scan rates; (b) GCD curves of RGO at different current densities

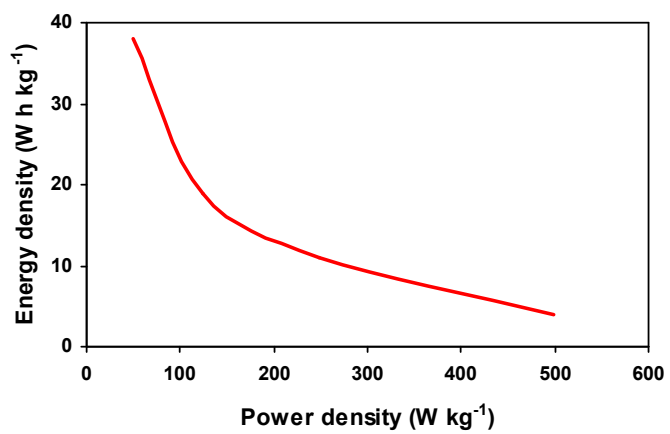

Fig. S8 Ragone plot of asymmetric supercapacitor
